# Supplementary material
Source: PubMed Central journal article supplement (PMC8768020)

**Immunity, Volume 55**

## **Supplemental information**

### **Are NKT cells a useful predictor of COVID-19 severity?**

**Hui-Fern Koay, Nicholas A. Gherardin, Thi H.O. Nguyen, Wuji Zhang, Jennifer R. Habel, Rebecca Seneviratna, Fiona James, Natasha E. Holmes, Olivia C. Smibert, Claire L. Gordon, Jason A. Trubiano, Katherine Kedzierska, and Dale I. Godfrey**

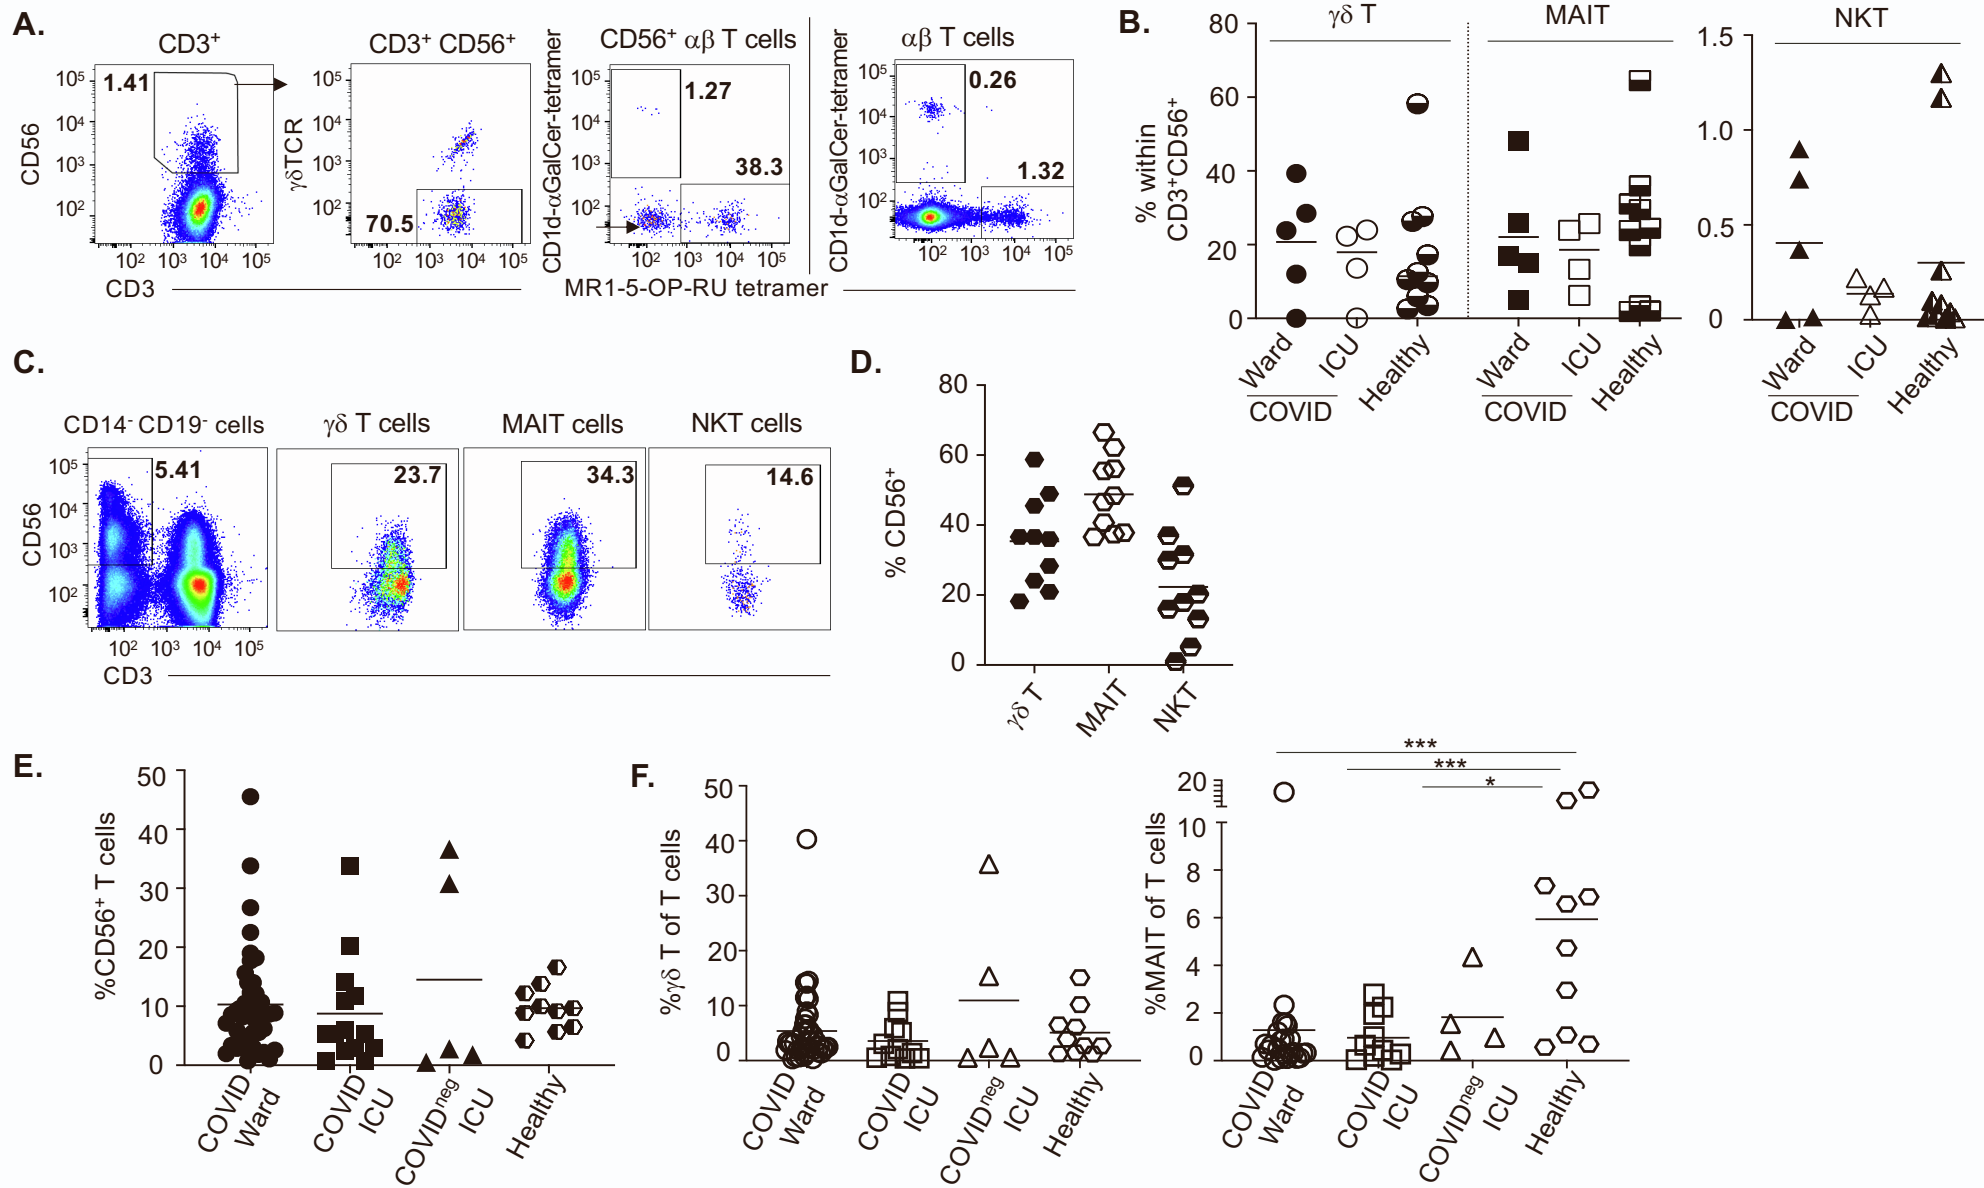

Supplement: mmc1.pdf [file mmc1.pdf]
